# Supplementary material
Source: publisher site journal article supplement (https://www.dovepress.com/article/supplementary_file/530693/530693%20Revised%20Supplementary%20Material.docx)
Supplement: Supplementary file 1 [file 530693%20Revised%20Supplementary%20Material.docx]

**Supplementary Materials**

| Table S1 CHS-DRG Core Disease Diagnosis Related Group (ADRG) in Neurology | |
| --- | --- |
| **ADRG encoding** | **ADRG name** |
| BL1 | Thrombolytic therapy for cerebrovascular disease |
| BR1 | Intracranial hemorrhagic disorder |
| BR2 | Cerebral ischemic disease |
| BS1 | Non-traumatic disorder of consciousness |
| BT1 | Viral brain, spinal cord and meningitis |
| BT2 | Other infections of the nervous system |
| BU1 | Nervous system tumor |
| BU2 | Degenerative disorders of the nervous system |
| BU3 | Demyelinating disease and cerebellar ataxia |
| BV1 | Epilepsy |
| BV2 | Neurogenic myopathy |
| BV3 | Headache |
| **BW1** | Congenital disorder of the nervous system |
| BW2 | Cerebral palsy |
| BX1 | Brain dysfunction |
| BX2 | Cranial/peripheral nerve disorders |
| BZ1 | Other disorders of the nervous system |
| Note ADRG codeing is from China Healthcare Security Diagnosis Related Groups, known as CHS-DRG,introduced by the National Medical Insurance Administration in 2019. | |

| Table S2 Evaluation dimensions and outcome variables | | | |
| --- | --- | --- | --- |
| **Evaluation dimensions** | **No** | **Outcome variables** | **Calculation formula or definition** |
| Inpatient service capacity | Y1 | Total DRG weight (total weight) | Σ (Cost weight of a specific DRG × Number of cases of that DRG in the Department ) |
|  | Y2 | Case mix index (CMI) | Σ (Cost weight of a specific DRG × Number of cases of that DRG in the department) / Total number of cases in the department |
|  | Y3 | Number of disease types in DRGs | ΣThe range of disease types covered by treated cases |
| Inpatient service cost | Y4 | Average length of stay (days) | Average length of stay = Total bed days occupied by discharged patients / Number of discharged patients during the same period |
|  | Y5 | Average cost per inpatient stay (RMB) | Total cost incurred by inpatients receiving treatment in the medical institution / Number of inpatient stays within a specific time period |
|  | Y6 | Average medication cost per inpatient stay (RMB) | Total medication cost for inpatients in the department / Number of inpatient stays within a specific time period |
|  | Y7 | Medication cost ratio (%) | Average medication cost per inpatient stay / Average cost per inpatient stay |
|  | Y8 | Average material cost per inpatient stay (RMB) | Total material cost for inpatients in the department / Number of inpatient stays within a specific time period |
|  | Y9 | Material cost ratio (%) | Total material cost per inpatient stay / Total cost per inpatient stay |
| Inpatient service efficiency | Y10 | Cost efficiency index | Σ (Cost ratio of each DRG group in the department × Number of cases in Each DRG group in the department) / Total number of cases in DRG groups |
|  | Y11 | Time efficiency index | Σ (Average length of stay ratio of each DRG group in the department × Number of cases in each DRG group in the hospital) / Total number of cases in DRG groups |

| Table S3 The main Stata commands used for analysis in the study | |
| --- | --- |
| **Analysis** | **Stata Commands** |
| t-test | gen byte reform_period = 0 replace reform_period = 1 if year >= 202301 list Y1 reform_period in 1/10 tabulate reform_period ttest Y1, by(reform_period) |
| itsa | gen year_str = string(year, "%06.0f") gen year_part = substr(year_str, 1, 4) gen month_part = substr(year_str, 5, 2) gen month = ym(real(year_part), real(month_part)) format month %tm destring Y1, replace tsset group month itsa Y1 month, trperiod(2023m1) treatid(1) figure lag(1) |
| Durbin-Watson test | itsa Y1 month, trperiod(2023m1) treatid(1) prais rhotype(tscorr) |
| Cumby-Huizinga test | actest, lags(6) |
| All code | import excel "C:\Users\lenovo\Desktop\dove 修改0707\data0707.xlsx", sheet("Sheet1") firstrow clear  gen year_str = string(year, "%06.0f")  gen year_part = substr(year_str, 1, 4)  gen month_part = substr(year_str, 5, 2)  gen month = ym(real(year_part), real(month_part))  format month %tm  destring x9, replace  tsset group month  itsa x9 month, trperiod(2023m1) treatid(1) lag(1) replace posttrend  regress x9 month if group == 1 & month <= tm(2023m1) // 在干预前期  regress x9 month if group == 1 & month > tm(2023m1) // 在干预后期  local num_tests 5  local alpha 0.05  local bonferroni_alpha = `alpha' / `num_tests'  regress x9 month if group == 1  local pval1 = _b[month]  regress x9 month if group == 2  local pval2 = _b[month]  if `pval1' < `bonferroni_alpha' {  display "Model 1 is significant after Bonferroni correction"  }  else {  display "Model 1 is not significant after Bonferroni correction"  }  if `pval2' < `bonferroni_alpha' {  display "Model 2 is significant after Bonferroni correction"  }  else {  display "Model 2 is not significant after Bonferroni correction"  } |
